# Supplementary material for: Truncated netrin-1 contributes to pathological vascular permeability in diabetic retinopathy
Source: JCI journal article supplement (doi:10.1172/jci84767), 2016-07-10
Supplement: sd1 [file 1]

**Supplemental S1:** (A) Blood glucose was monitored at 8 weeks of diabetes; only mice with glycemia exceeding 17 mM were considered as diabetic (n = 13), \*\*\* $P < 0.001$ . Data are represented as mean  $\pm$  S.E.M. (B) Permeability was assessed to validate our STZ model as a good model of retinal permeability; STZ mice showed higher retinal permeability compared to control mice (Citrate) (n = 4, \*\*\* $P < 0.001$ ). Data are represented as mean  $\pm$  S.E.M. (C) Representative angiography with confocal microscopy confirmed that diabetic retina showed leaky vessels and had higher permeability (n = 4). Leaky vessels were identified and characterized by confocal microscopy (FITC Dextran). Scale bar = 200  $\mu$ m. (D) Physiological parameters presented in a polygonal graphic form; Permeability, Animal age, Retina weight, Glycemia, and Animal weight.

Data are expressed as mean  $\pm$  S.E.M.

Statistical analysis: t-test

**Supplemental S2:** (A) FACS analysis of HRMEC transfected with siNeg vs fluorescent siGlo green (n = 3) and qPCR analysis (B) revealed that transfection worked with an efficiency of 80% (n = 3), \*\*\* $P < 0.001$ . (C) *unc5B*, *neol*, *a2br* mRNA levels in HRMEC transfected with siUnc5B, siNeo1 and siAA2BR (n = 3), \* $P < 0.05$ . : i. *unc5b*, *neol*, *aa2br* mRNA levels in HRMEC transfected with siUNC5B (Untreated  $1.000 \pm 0.1342$ , siNeg  $0.9392 \pm 0.02002$ , ns,

siUNC5B  $0.3676 \pm 0.0415$ ,  $p < 0.05$ , siNEO1  $0.9582 \pm 0.0421$ , ns, siAA2BR  $0.8292 \pm 0.0386$ , ns), ii. siNEO1 (Untreated  $1.000 \pm 0.1342$ , siNeg  $0.9392 \pm 0.02002$ , ns, siUNC5B  $0.8688 \pm 0.0712$ , ns, siNEO1  $0.2920 \pm 0.0990$ ,  $p < 0.05$ , siAA2BR  $0.7972 \pm 0.0373$ , ns) and iii siAA2BR (untreated  $1.000 \pm 0.1342$ , siNeg  $0.9392 \pm 0.02002$ , ns, siUNC5B  $1.069 \pm 0.2003$ , ns, siNEO1  $0.7453 \pm 0.0829$ , ns, siAA2BR  $0.2666 \pm 0.0696$ ,  $p < 0.01$ ns)

Data are expressed as mean  $\pm$  S.E.M.

Statistical analysis: One way Anova with posthoc Tukey



# Figure S1

**A**

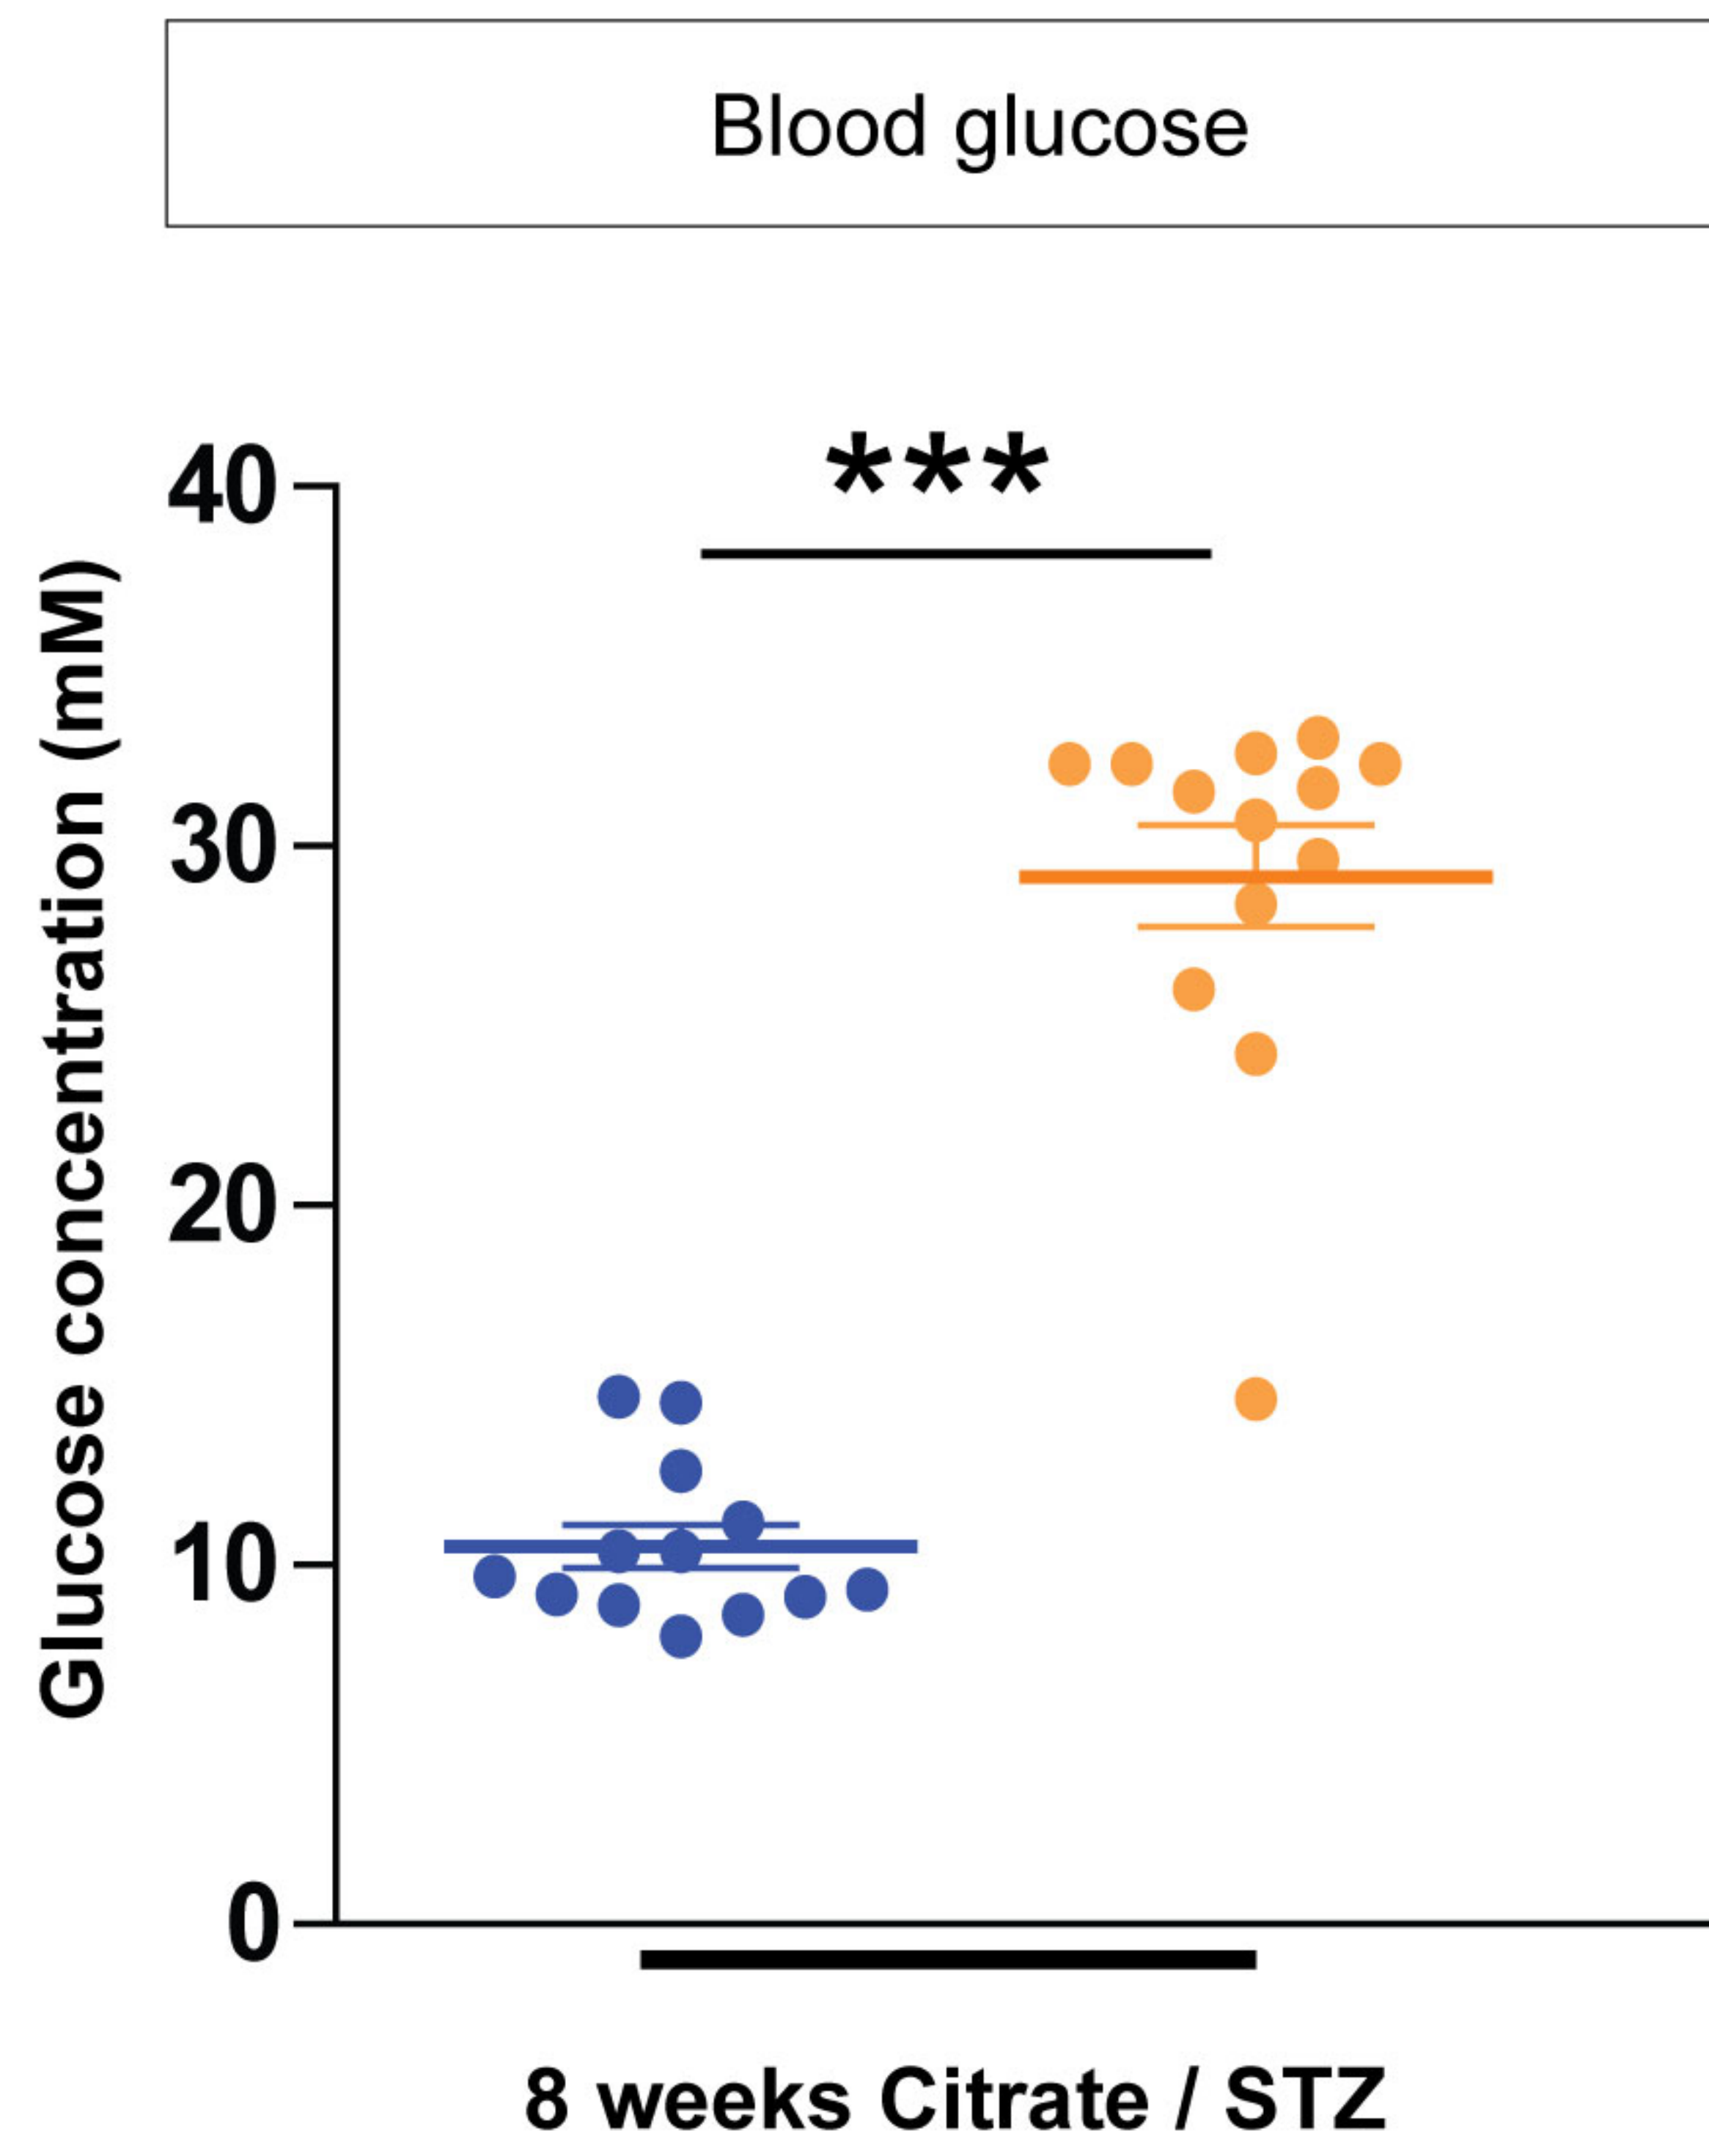

**B**

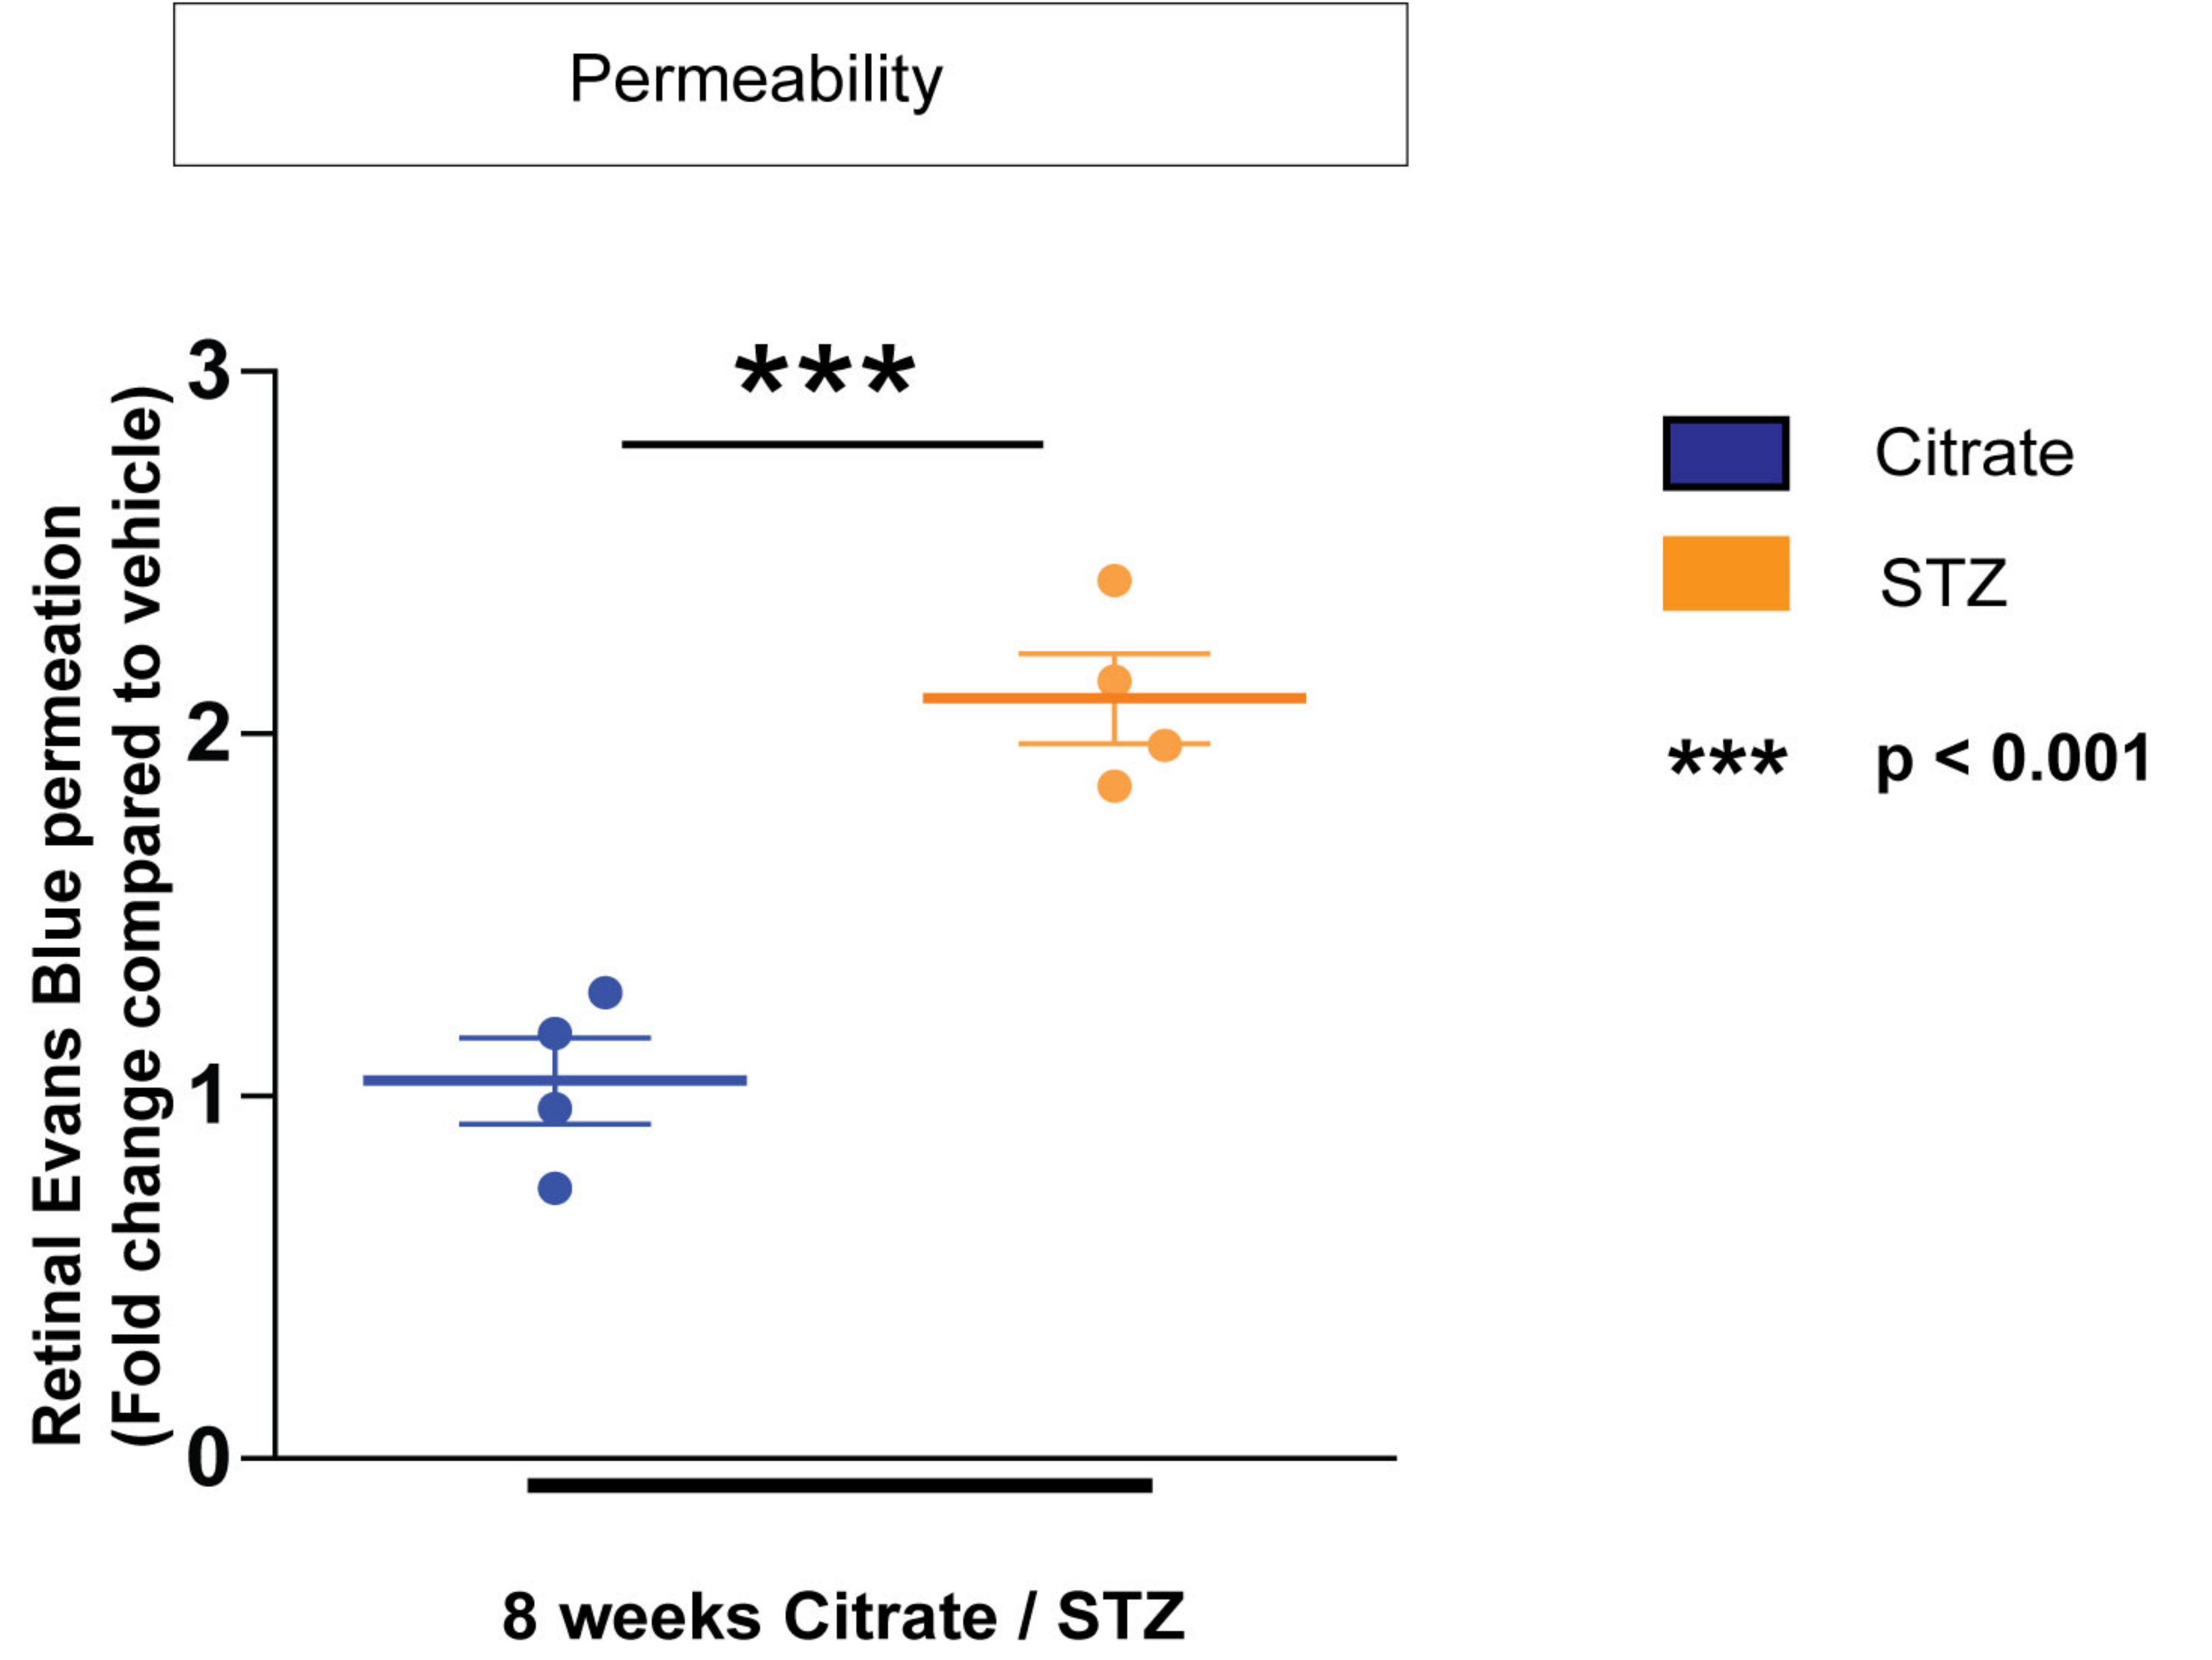

**C**

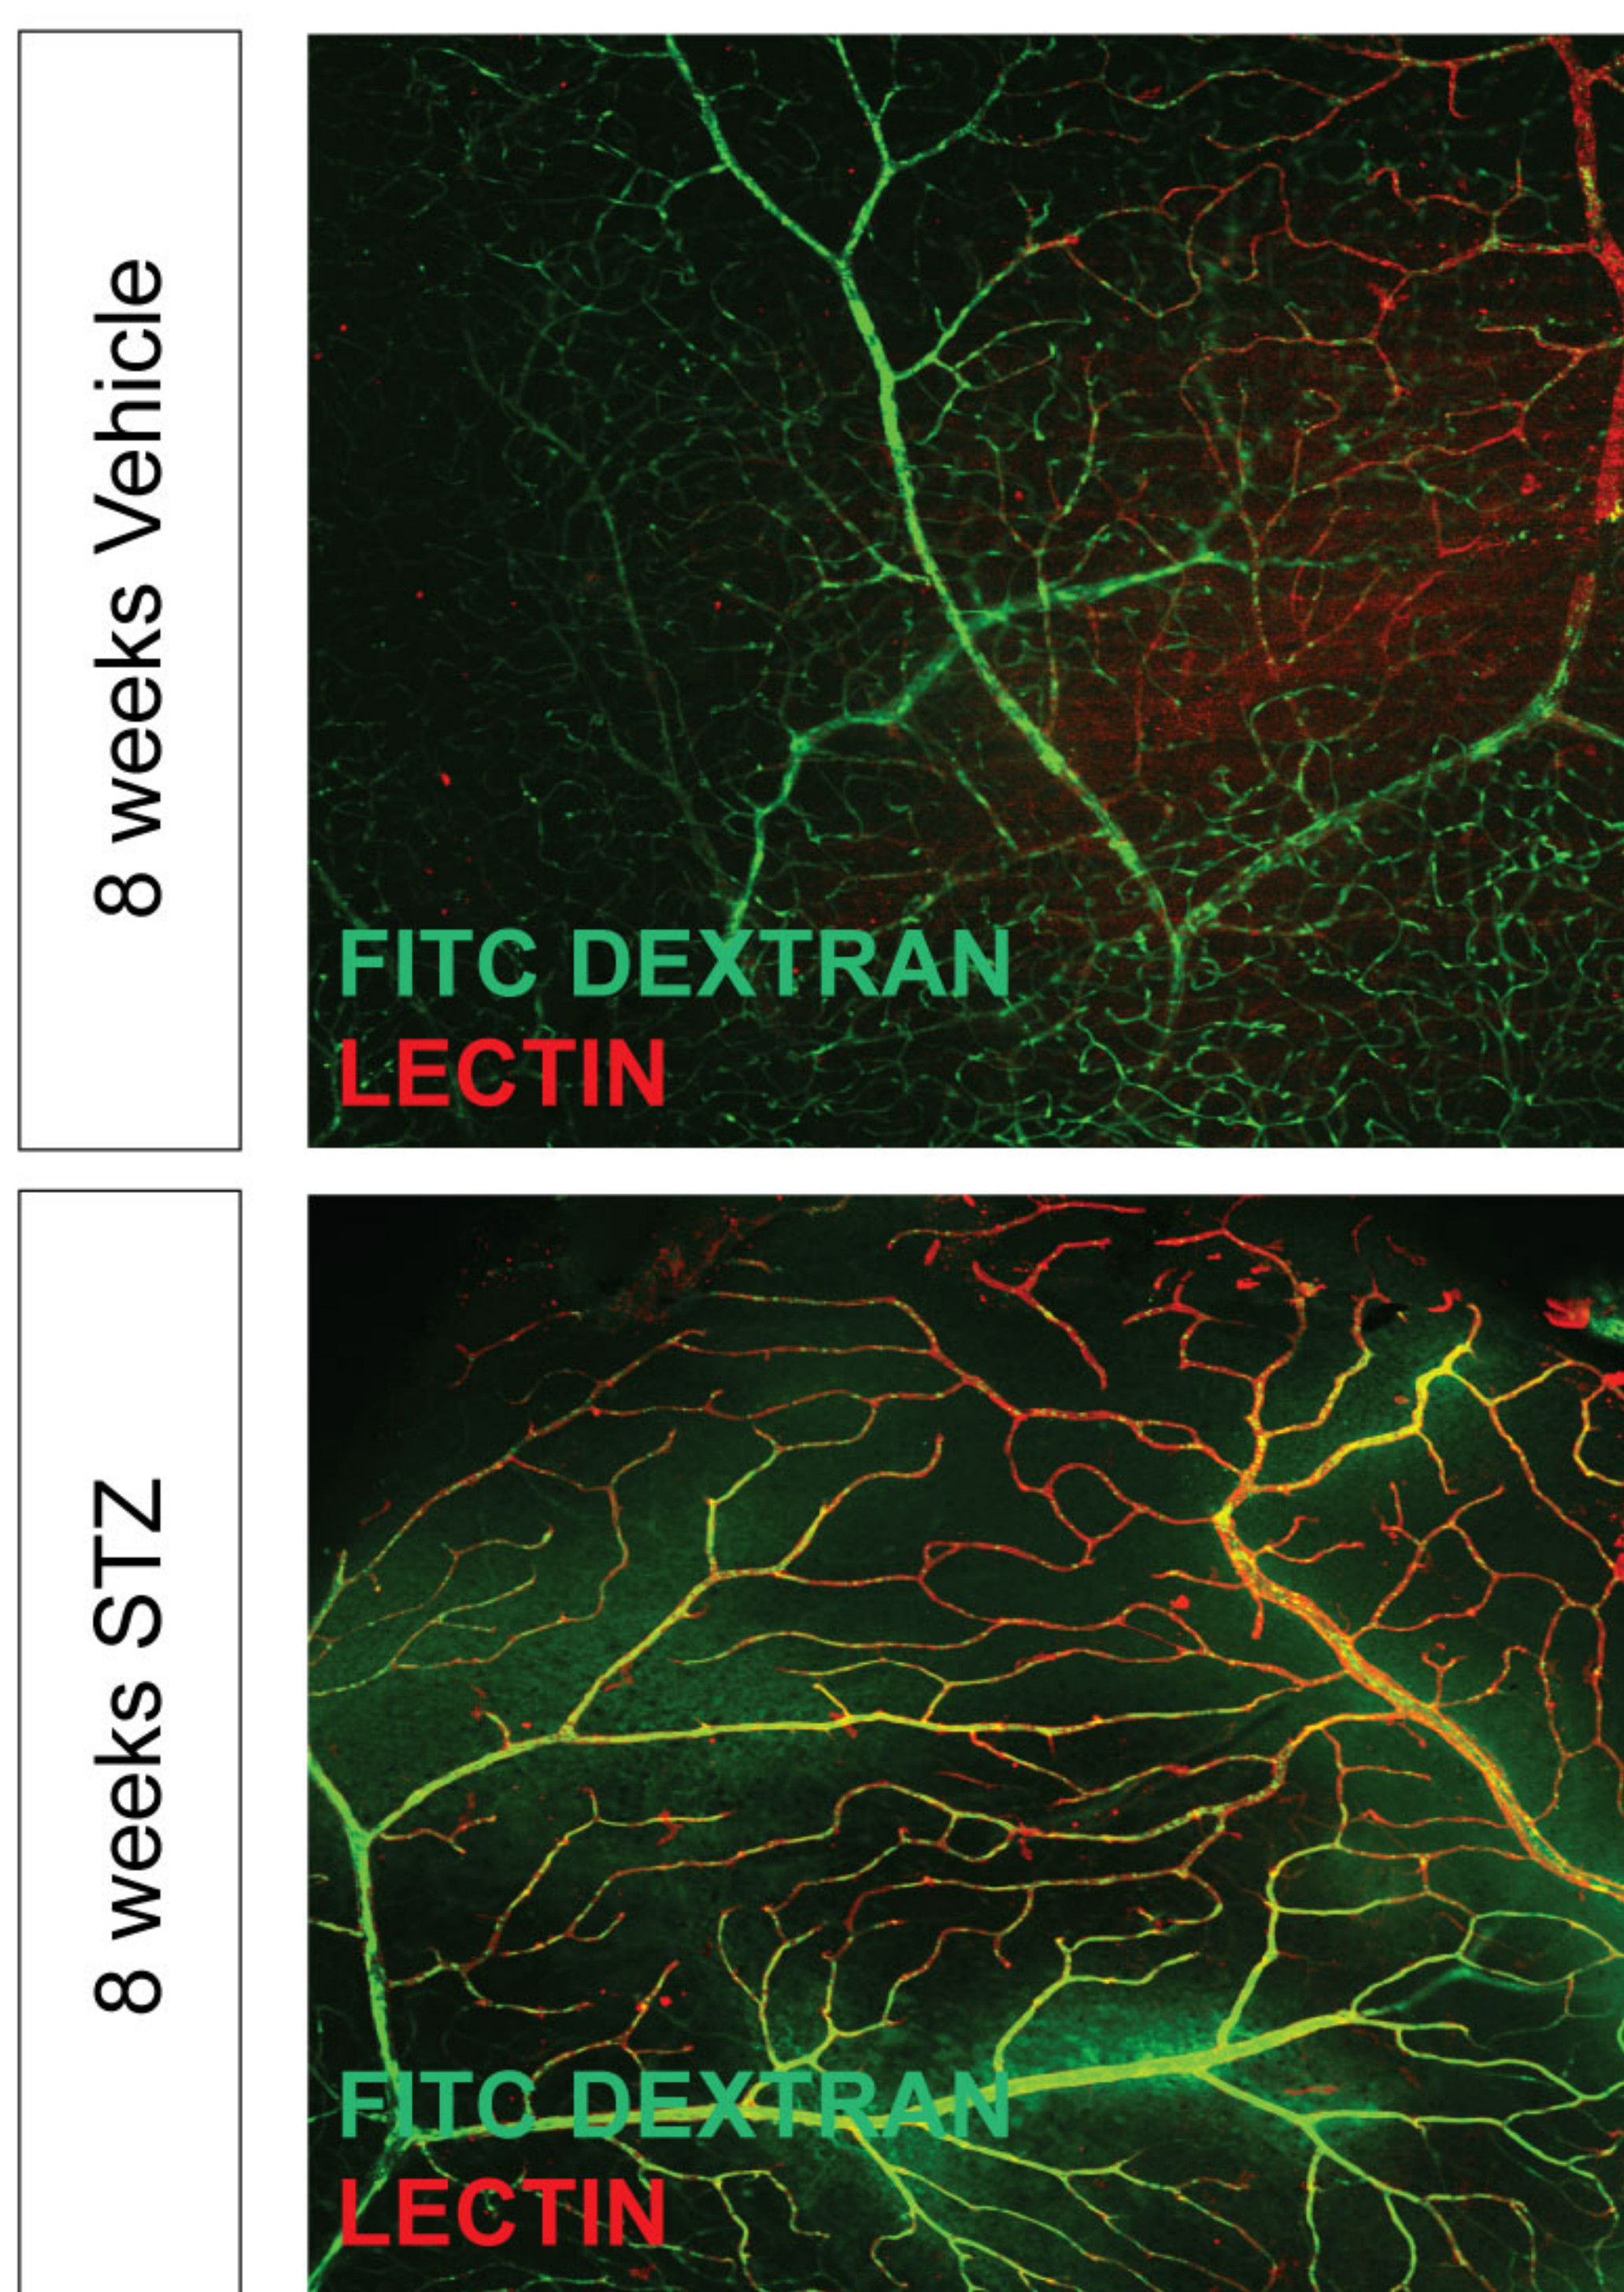

**D**

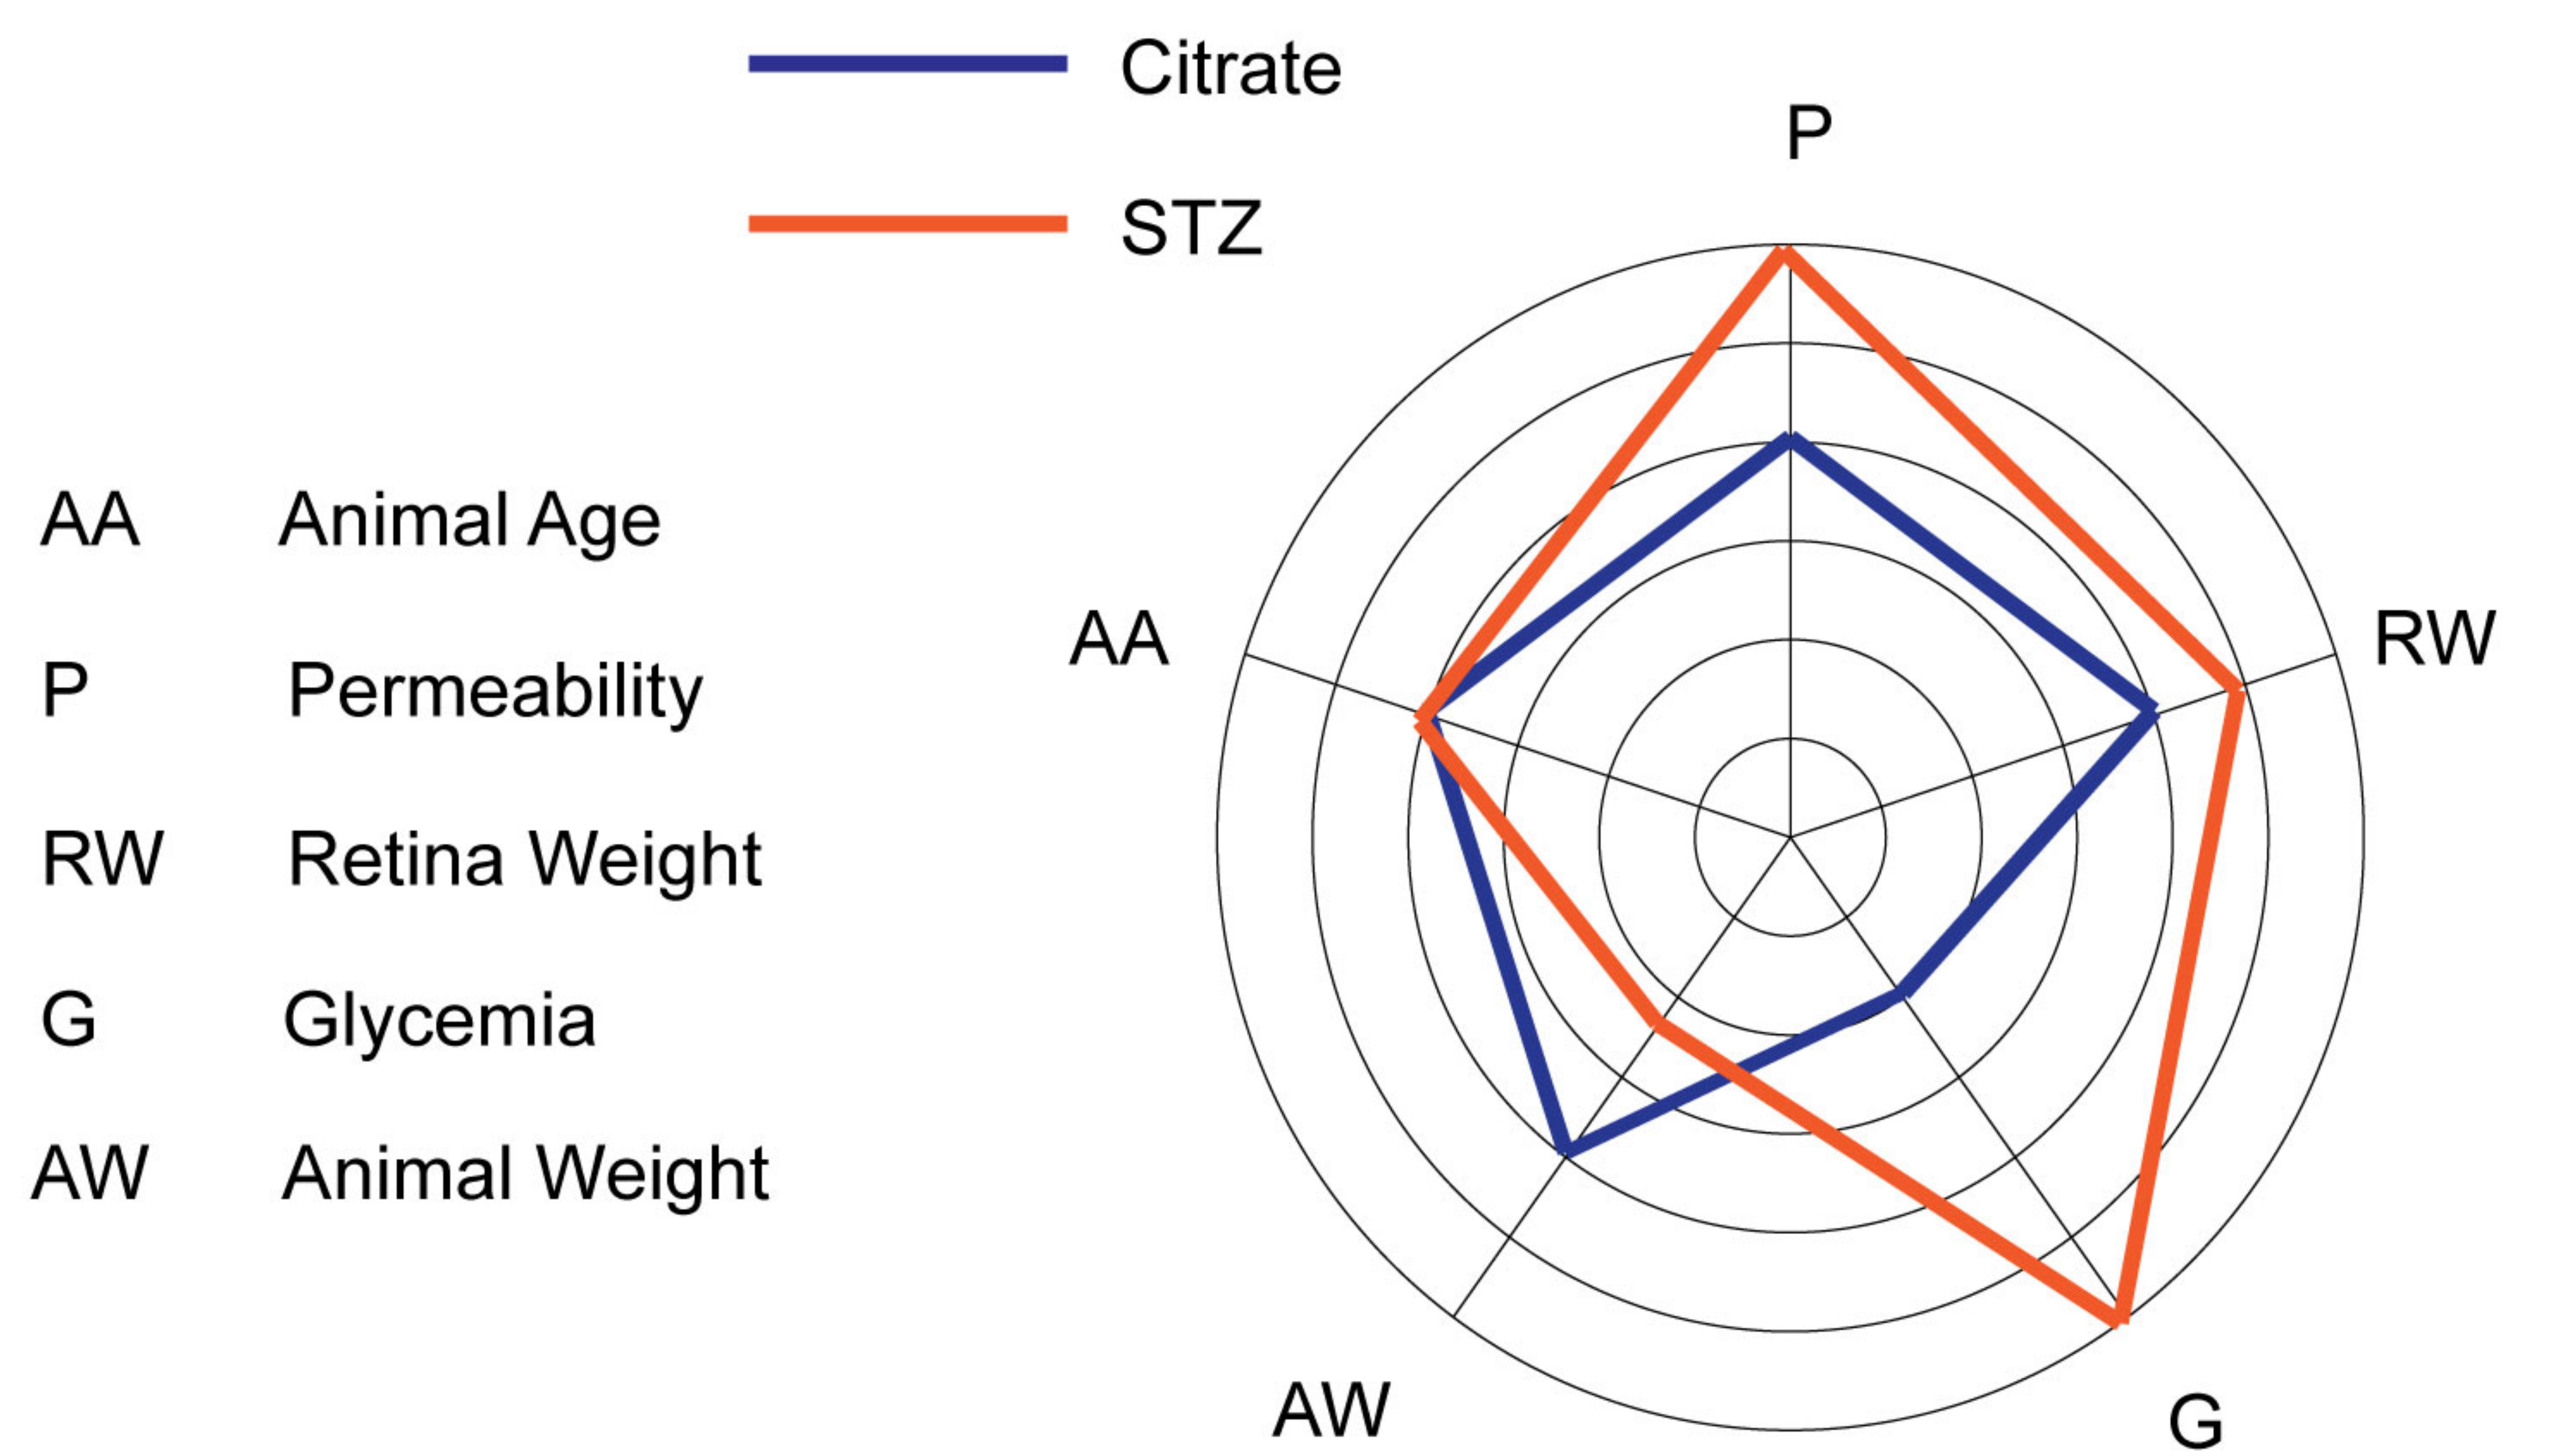



# Figure S2

**A**

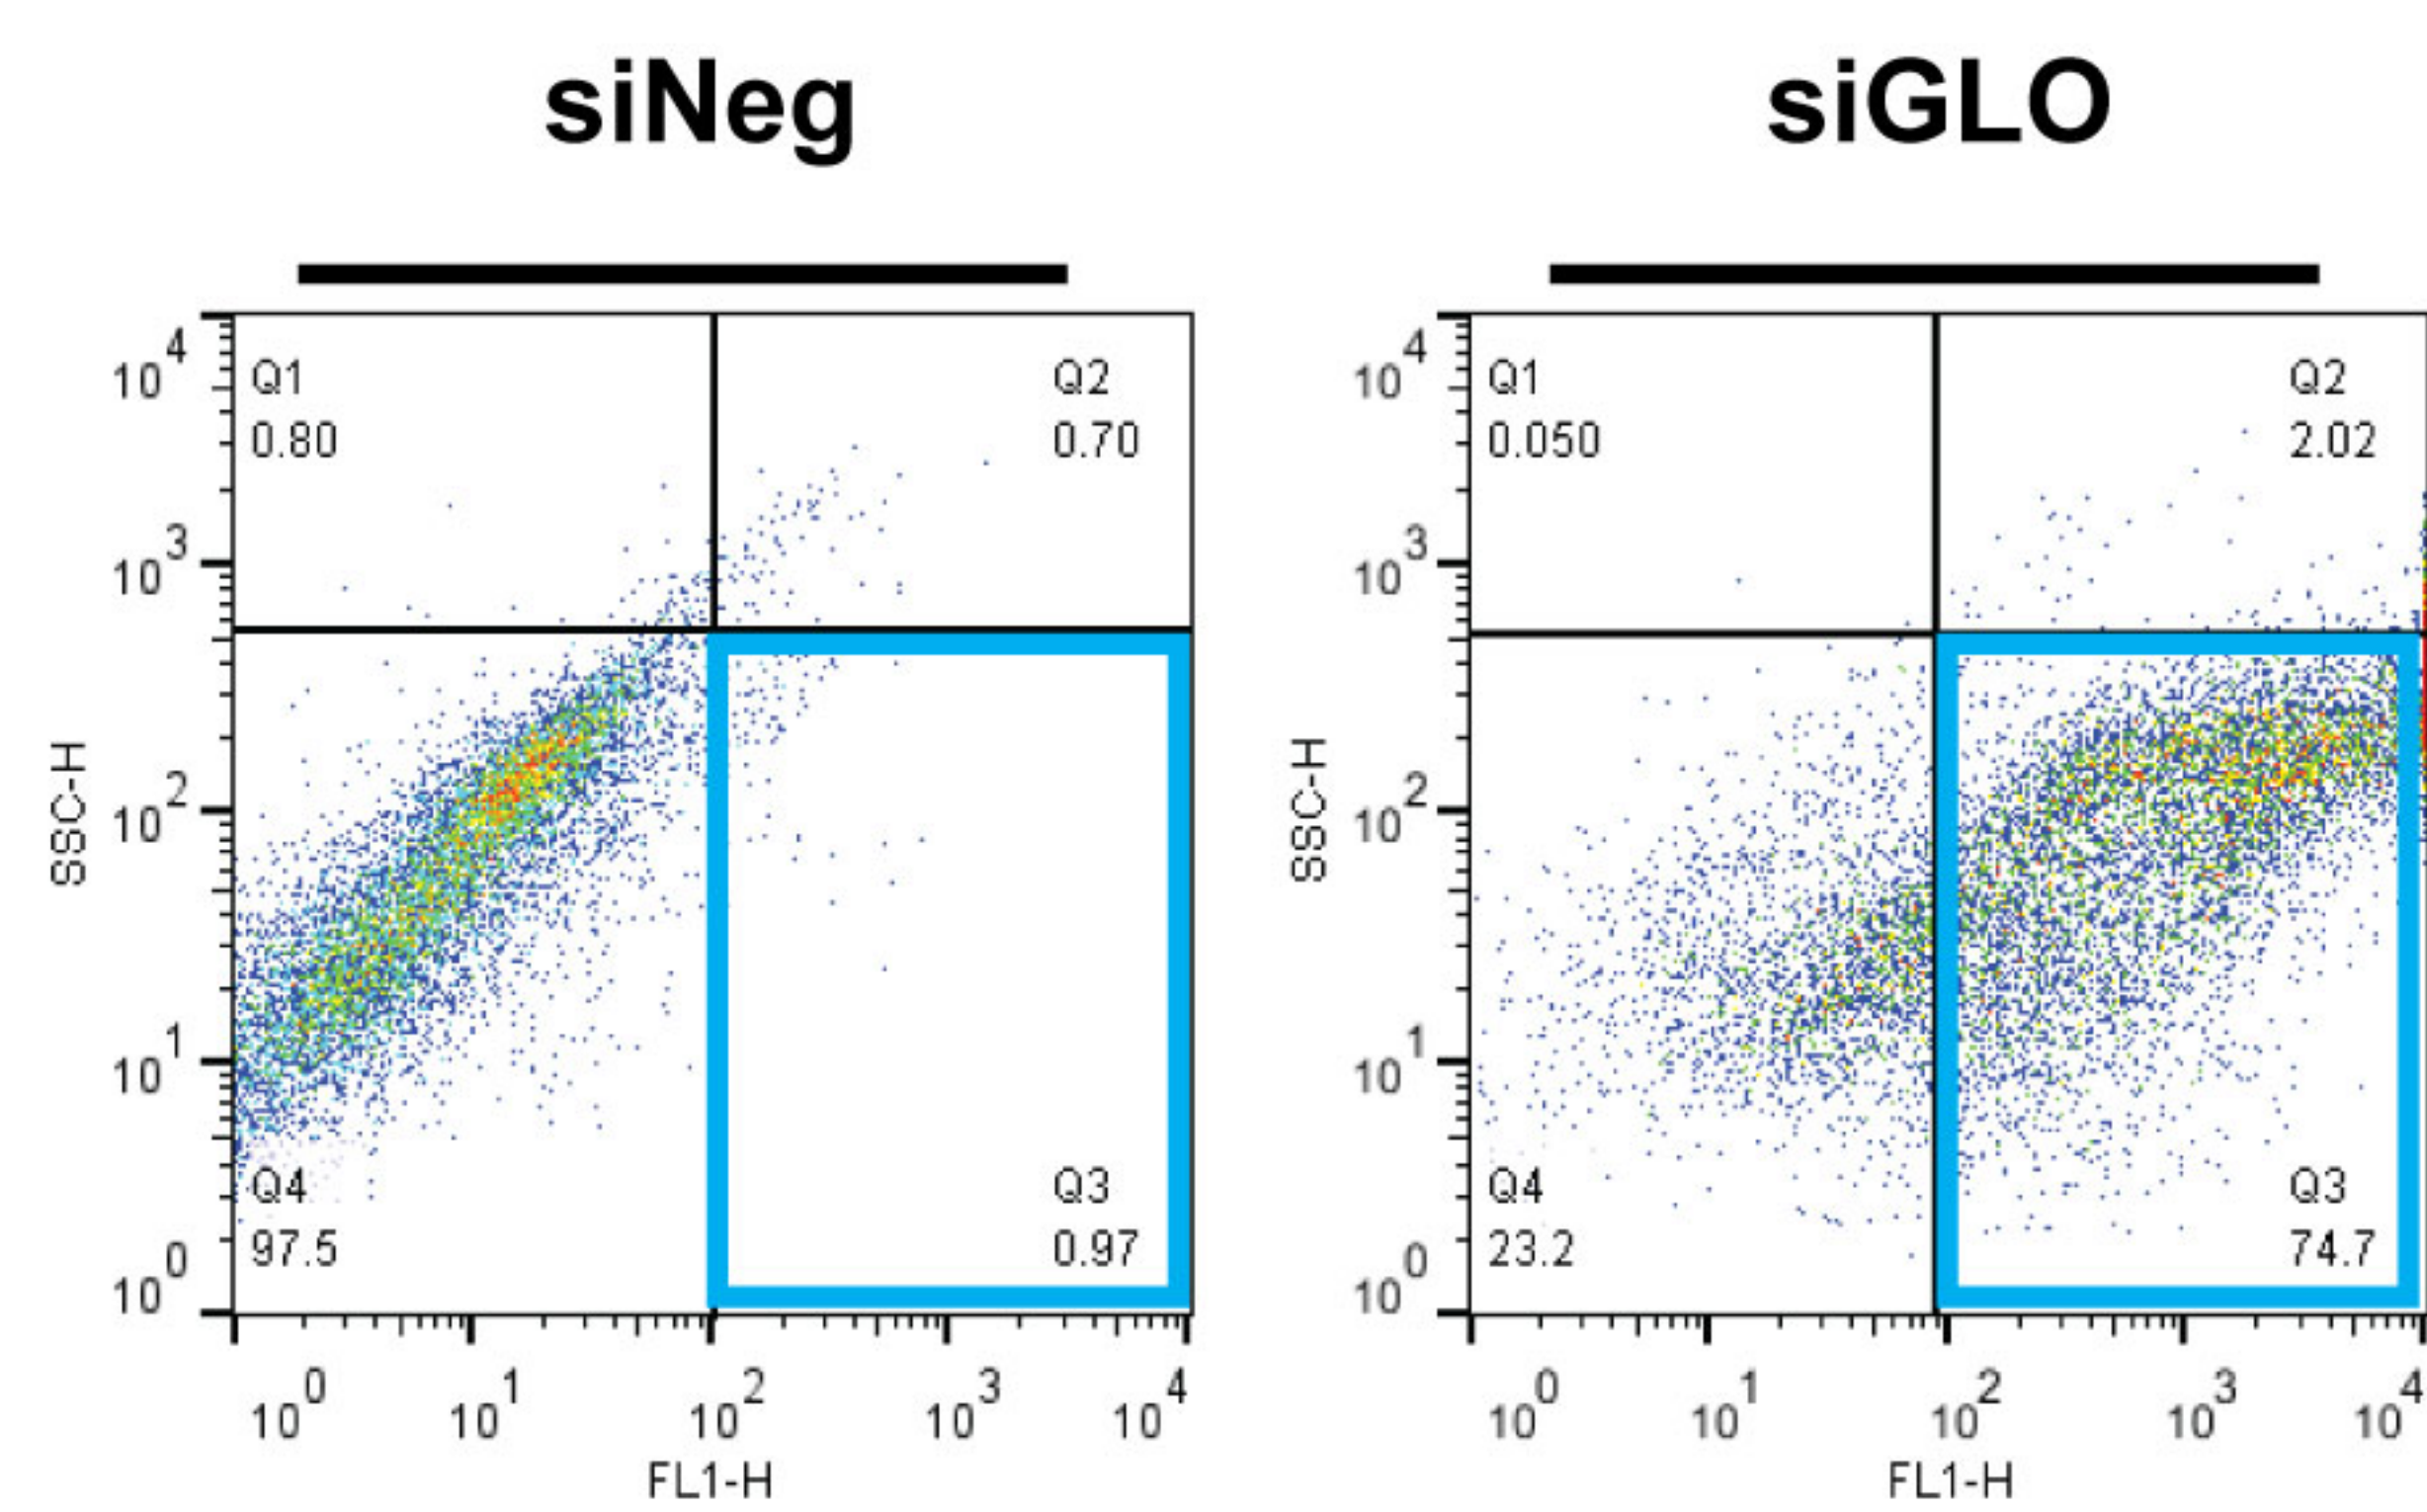

**B**

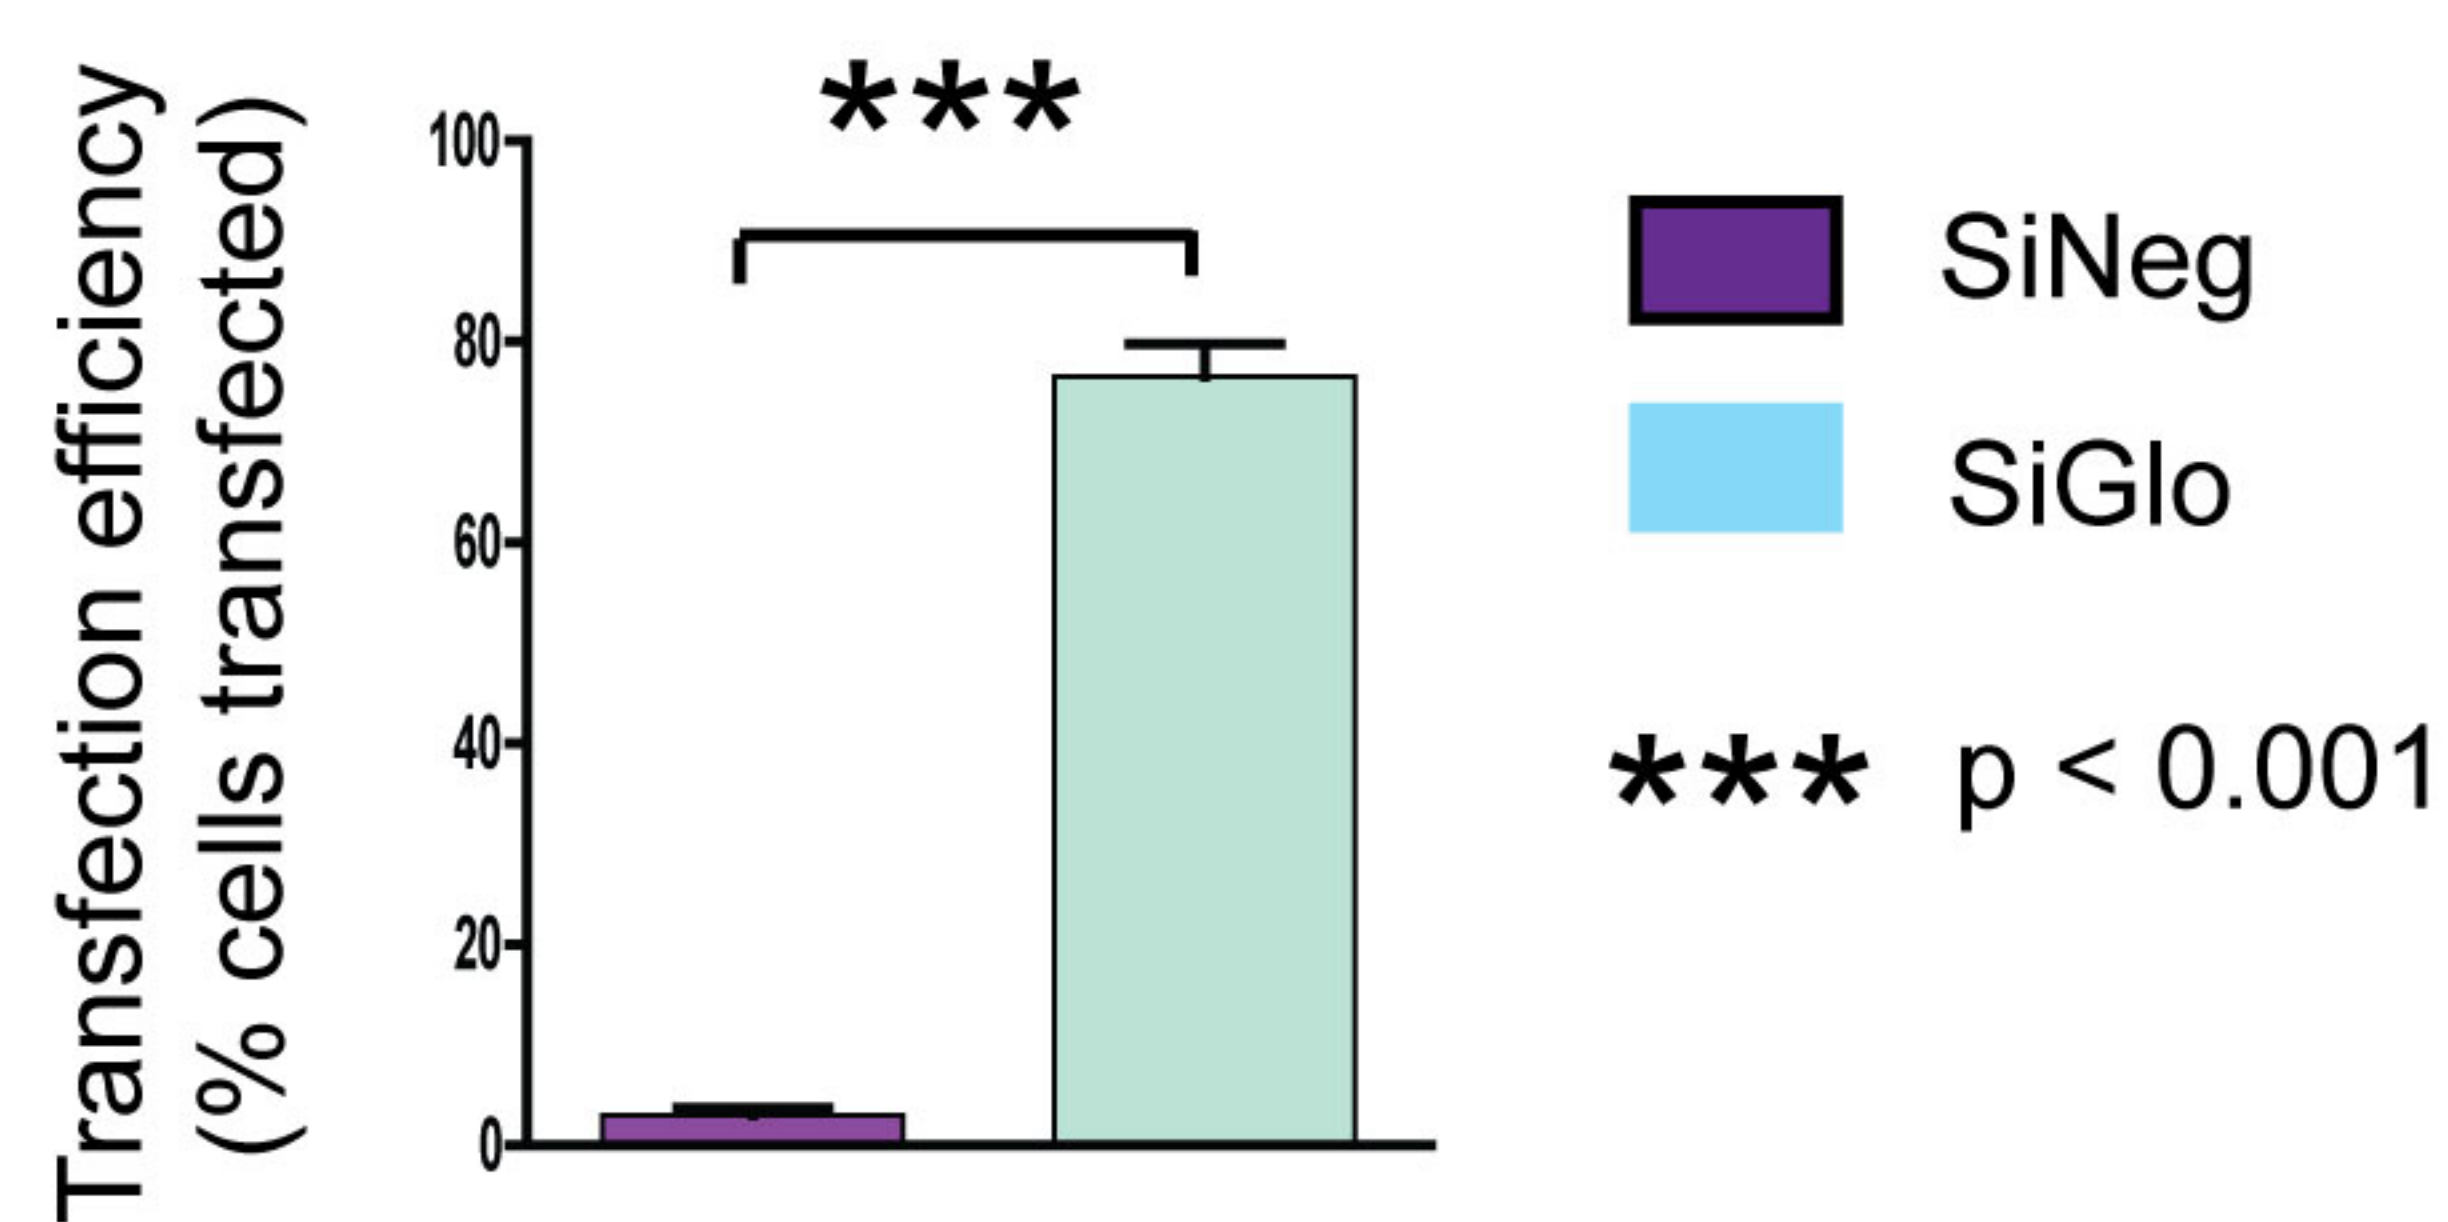

**C**

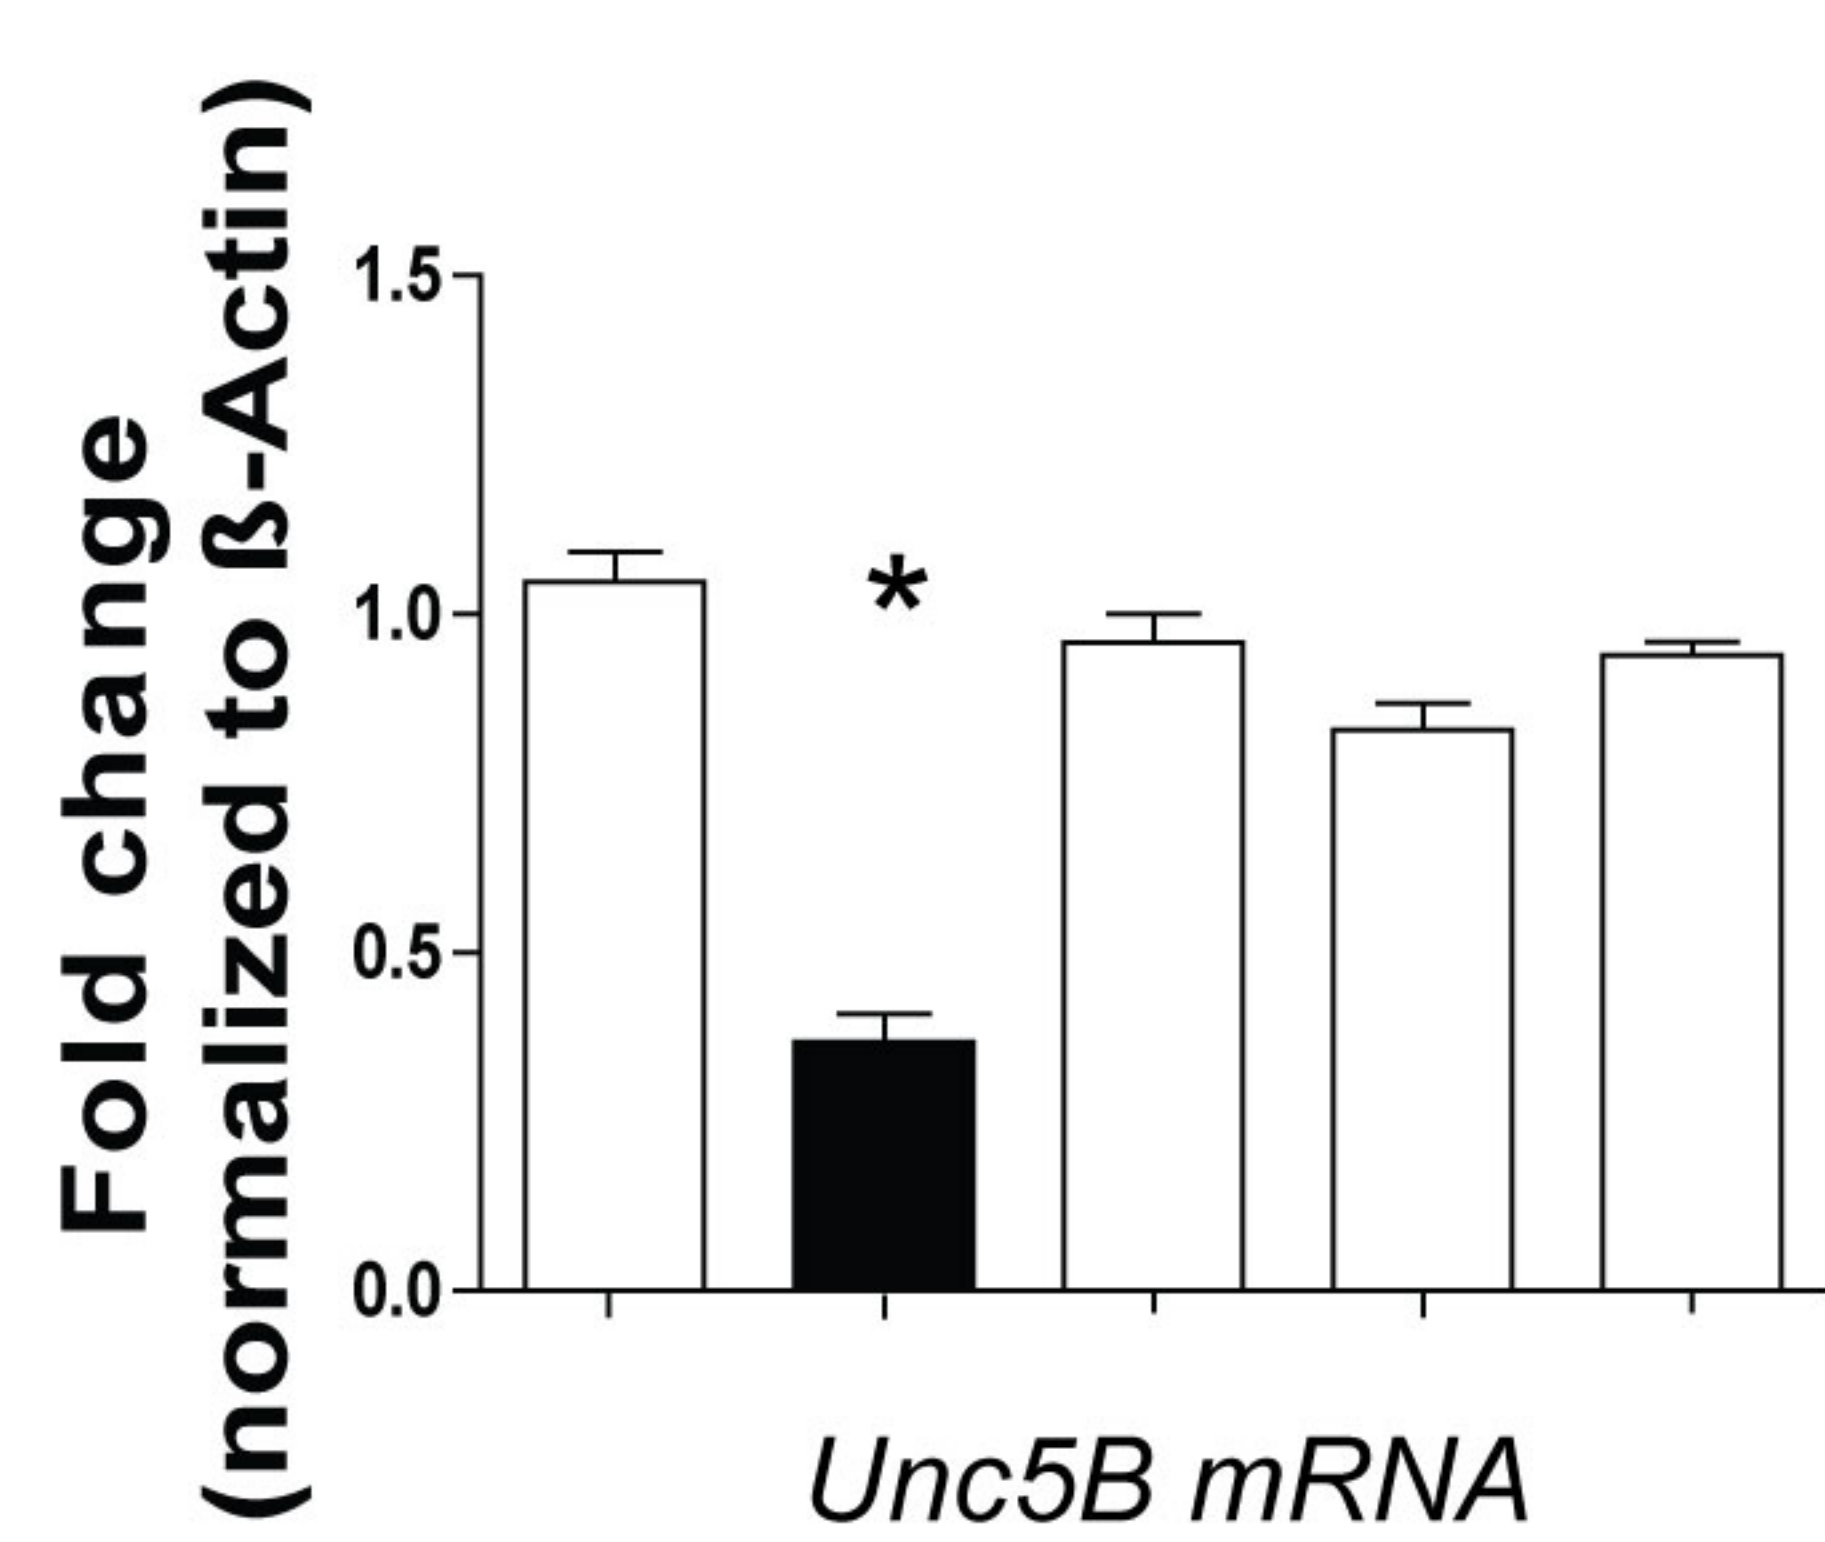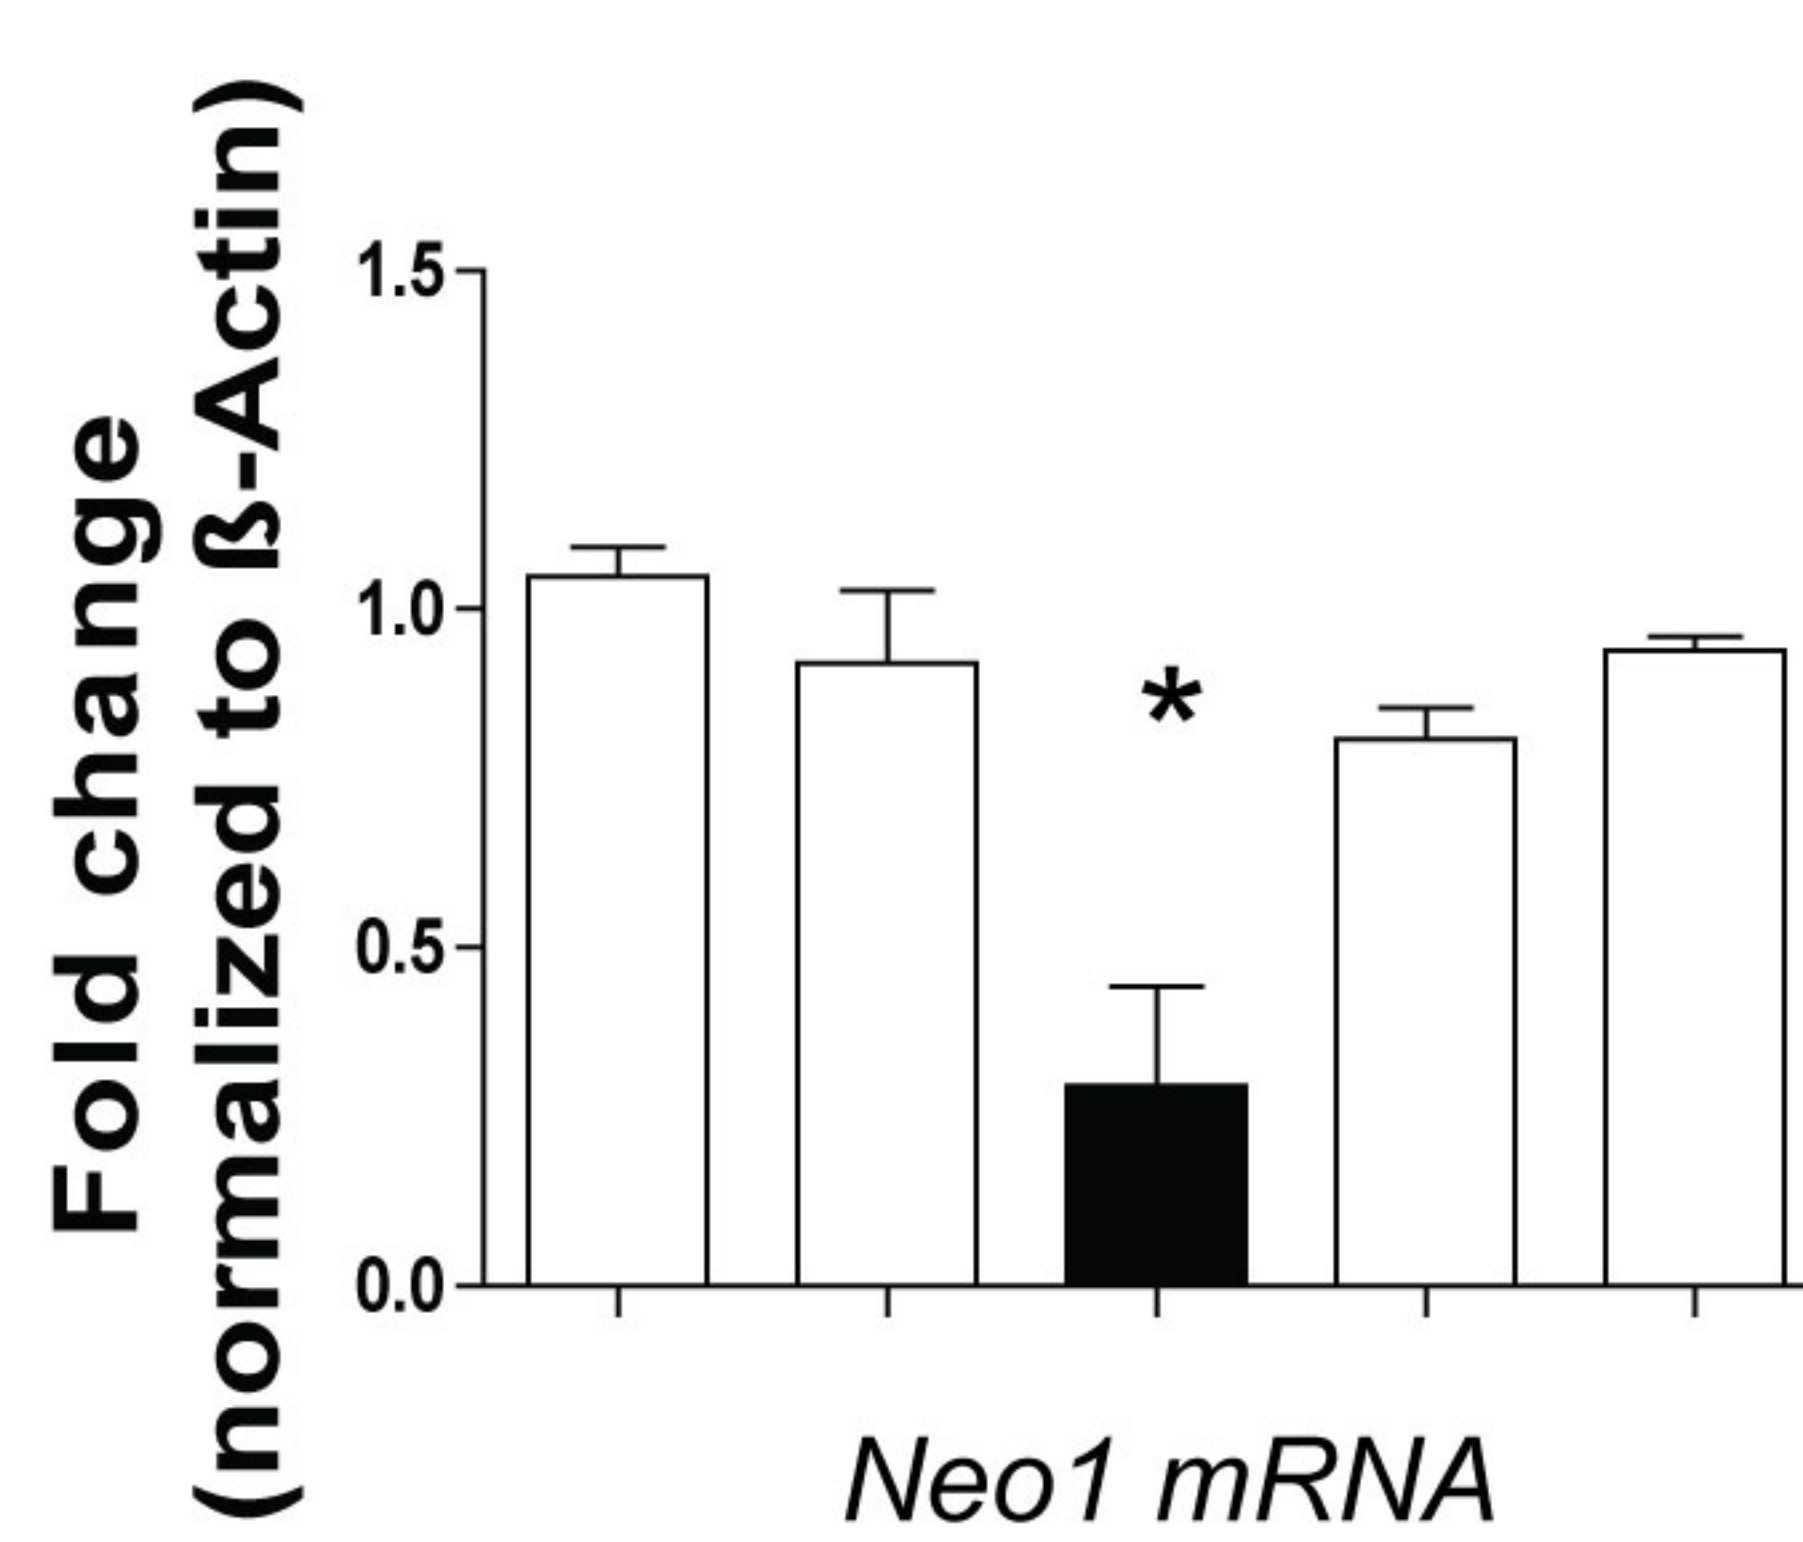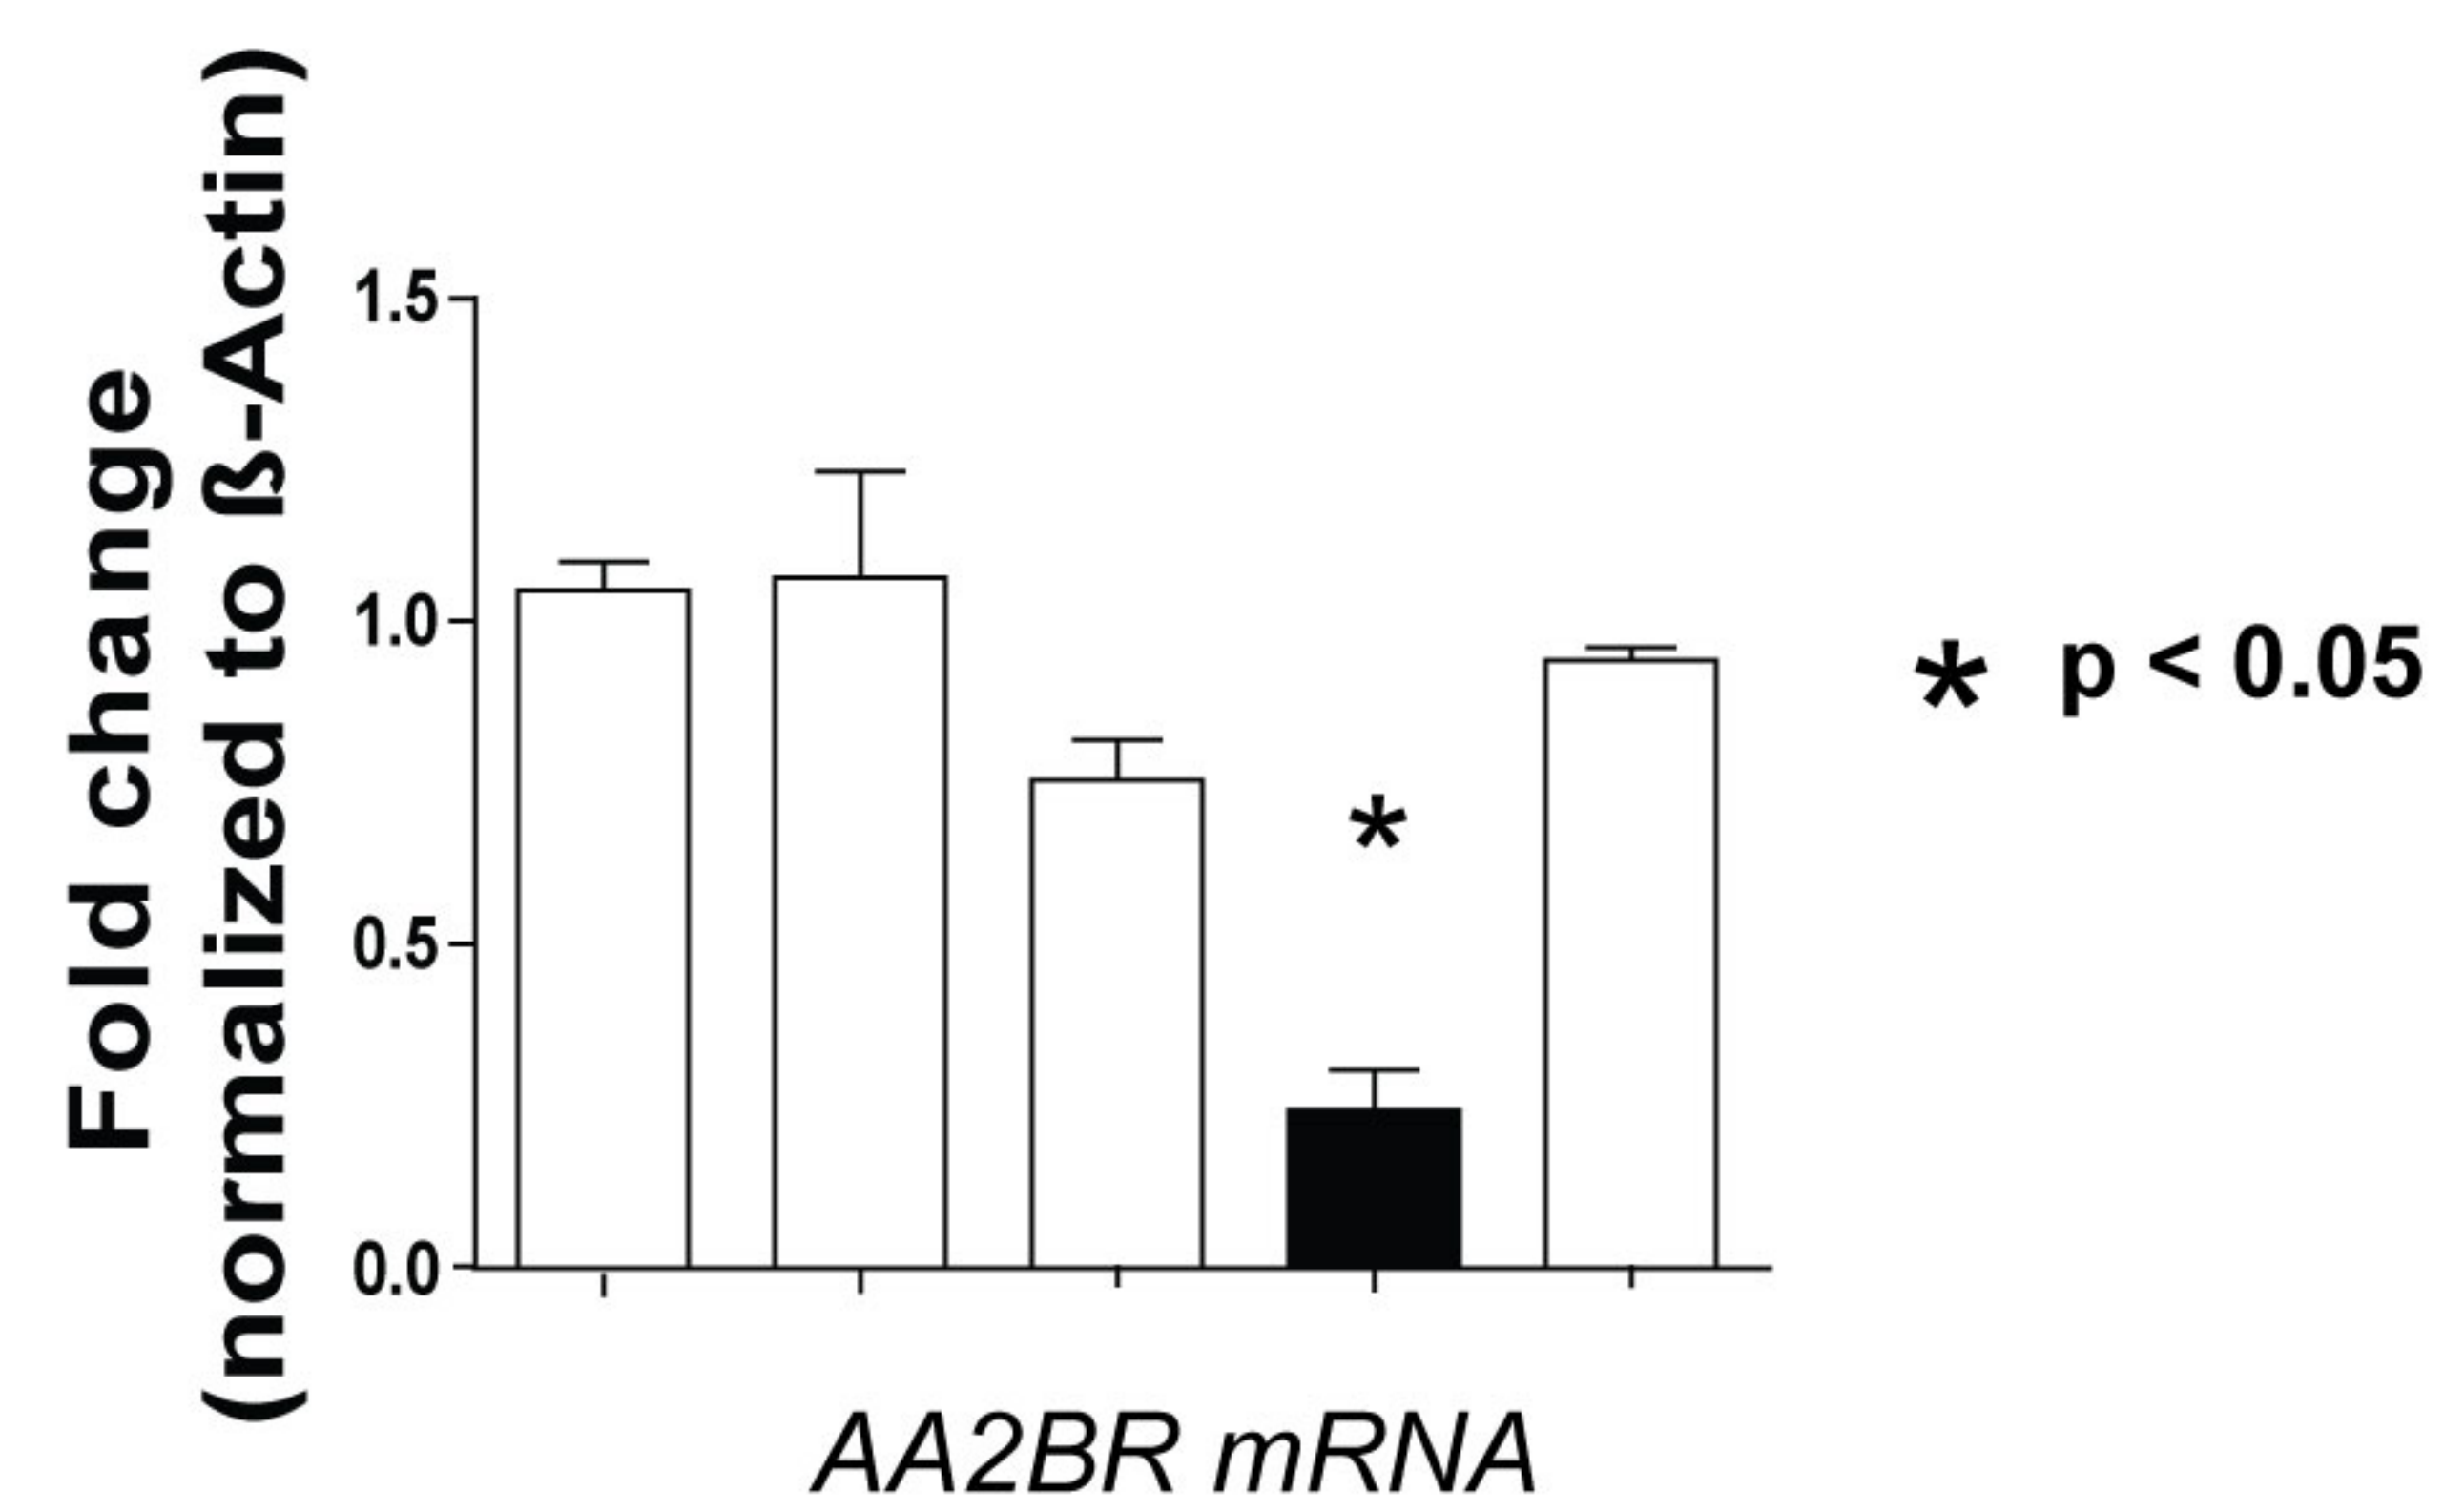

|           |   |   |   |   |   |   |   |   |   |   |   |   |   |   |   |   |   |   |   |
|-----------|---|---|---|---|---|---|---|---|---|---|---|---|---|---|---|---|---|---|---|
| Untreated | + | - | - | - | - | + | - | - | - | - | + | - | - | - | - | + | - | - | - |
| siUNC5B   | - | + | - | - | - | - | + | - | - | - | - | + | - | - | - | - | - | - | - |
| siNEO1    | - | - | + | - | - | - | - | + | - | - | - | - | + | - | - | - | - | - | - |
| siAA2BR   | - | - | - | + | - | - | - | - | + | - | - | - | - | + | - | - | - | - | - |
| siNeg     | - | - | - | - | + | - | - | - | - | + | - | - | - | - | + | - | - | - | - |
